# Supplementary material
Source: ML conference proceedings conference paper supplement (https://openaccess.thecvf.com/content/cvpr_2016/html/Zhu_Traffic-Sign_Detection_and_2016_CVPR_paper.html)
Supplement: Supplementary file 2 [file Zhu_Traffic-Sign_Detection_and_2016_CVPR_supplemental.zip]

# Supplemental Document 3: Comparison of network branching in layers 6 and 7

This supplemental document demonstrates the superiority of using branching in layer 6 of the network over layer 7, for the method given in the paper entitled “Traffic Sign Detection and Classification in the Wild”. Training the two networks under identical conditions as described in the paper, and using the same number of iterations, we obtain the following recall-accuracy curves for small, medium and large traffic signs; we also give overall results for all sizes of signs. The results indicate the superiority of branching in layer 6 over layer 7, for all sizes of sign.

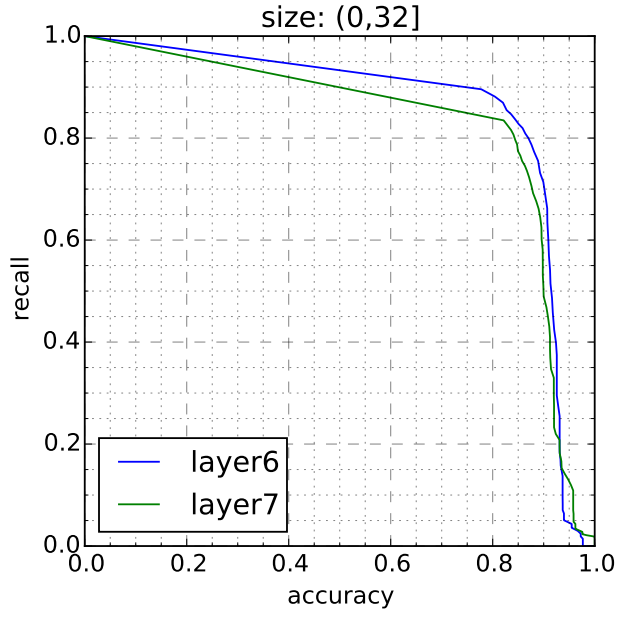

(a)

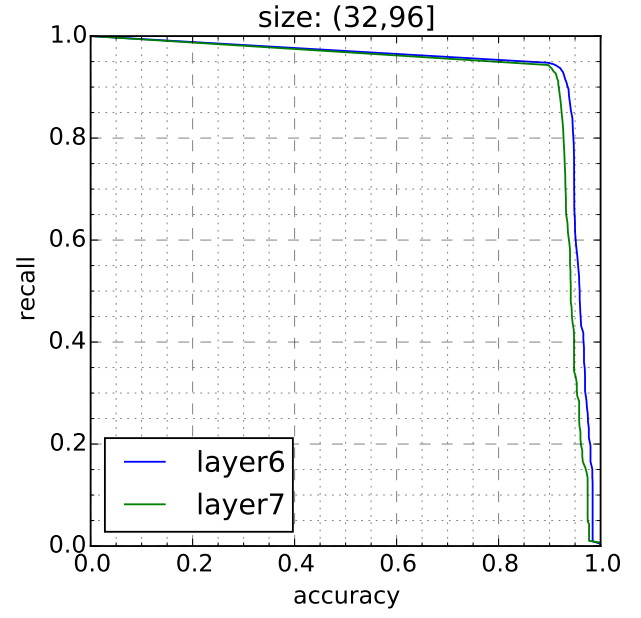

(b)

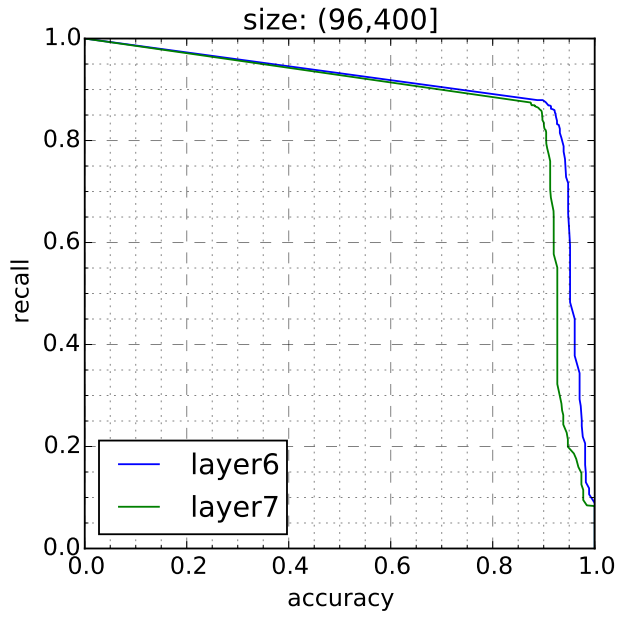

(c)

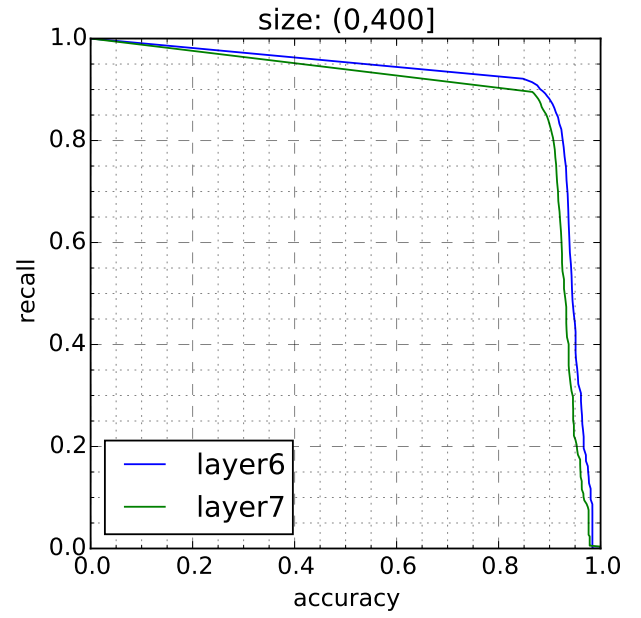

(d)

Fig. 1. Recall-accuracy comparison for branching in layer 6, or in layer 7, of the network. Plots (a), (b), (c) show recall-accuracy curves for traffic signs with sizes in the range (0,32] pixels, (32,96] pixels, and (96,400] pixels respectively. Plot (d) gives the overall recall-accuracy curve for all sizes of sign.
