# Supplementary material
Source: ML conference proceedings conference paper supplement (https://openaccess.thecvf.com/content/cvpr_2016/html/Zhu_Traffic-Sign_Detection_and_2016_CVPR_paper.html)
Supplement: Supplementary file 4 [file Zhu_Traffic-Sign_Detection_and_2016_CVPR_supplemental.zip]

Archive with 4 entries (3 files):
- 0682-supp/
- 0682-supp/supplymentary_classification_optimized.pdf
- 0682-supp/supplymentary_comparison.pdf
- 0682-supp/supplymentary_detection_optimized.pdf
